# Supplementary material for: DNA alteration‐based classification of uveal melanoma gives better prognostic stratification than immune infiltration, which has a neutral effect in high‐risk group
Source: PubMed Central journal article supplement (PMC6558590; doi:10.1002/cam4.2122), 2019-04-25
Supplement: CAM4-8-3036-s001.pdf [file CAM4-8-3036-s001.pdf]

## Supplementary Figures

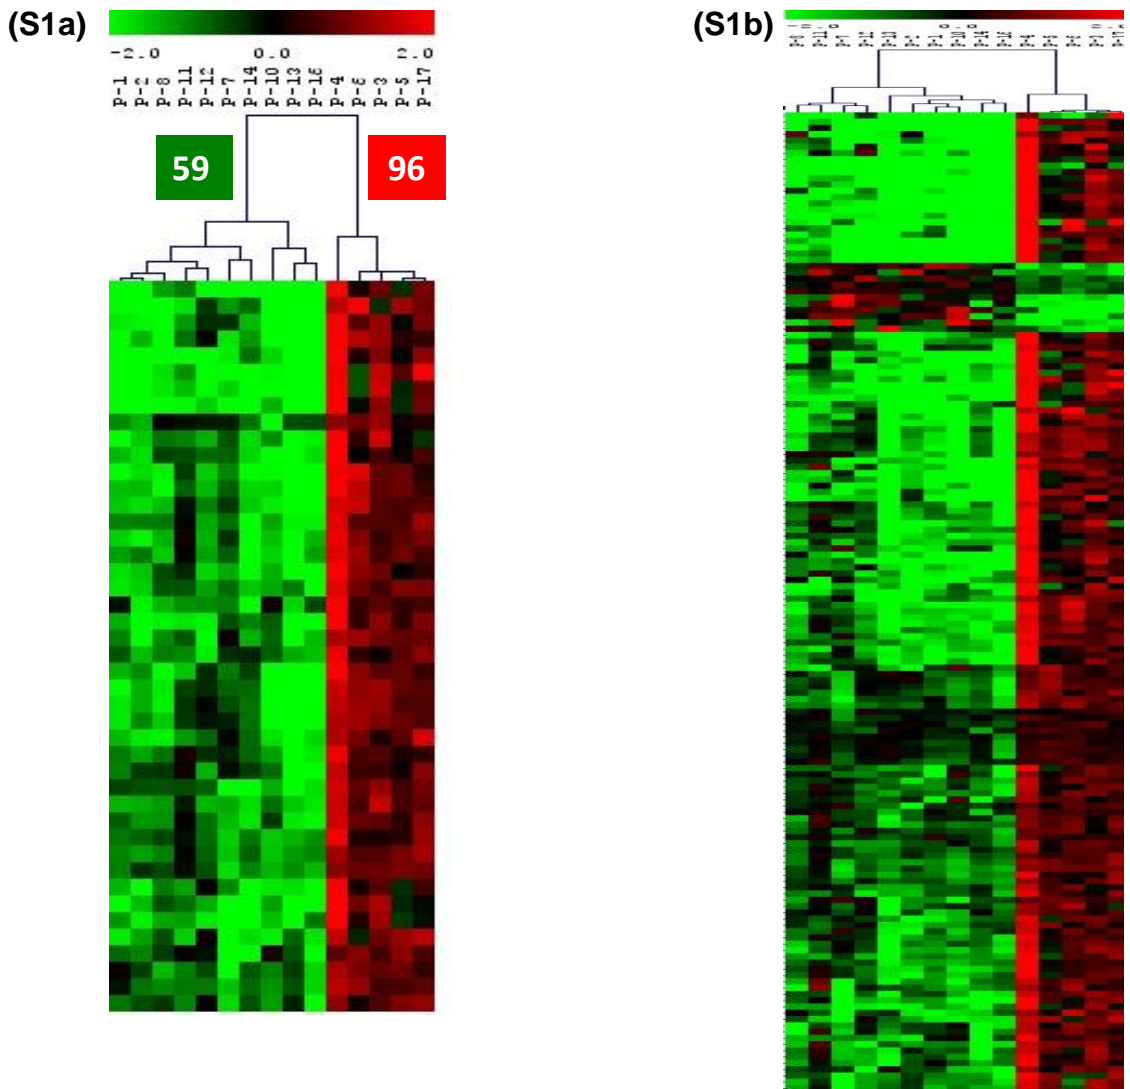

### **Figure S1. Microarray analyses**

S1a. Heat map of 44 probe sets isolated from t-test performed on the 1500 probe sets with the highest standard deviation. Node values (59 and 96) obtained by bootstrapping (100 iterations).

S1b. Heat map of 156 probe sets isolated from T-test performed on all immune response genes (red and green indicate over and underexpression, respectively).

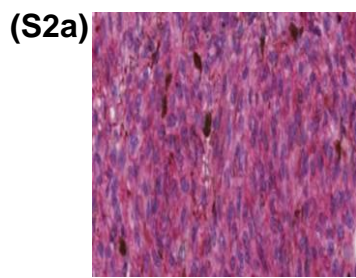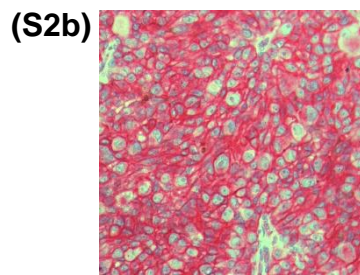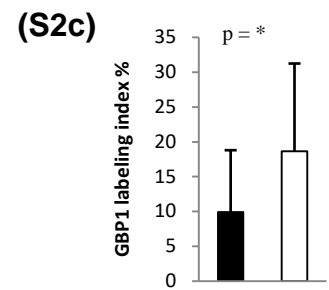

**Figure S2. GBP1 immunohistochemistry**

S2a and S2b. Detection of GBP1 protein in immune infiltrate-low (S2a) and immune infiltrate-high (S2b) uveal melanoma.

S2c. Comparison of GBP1-labeling indices in immune infiltrate-high and immune infiltrate-low uveal melanomas.

(p-value: \*  $\leq 0.05$ )

(S3)

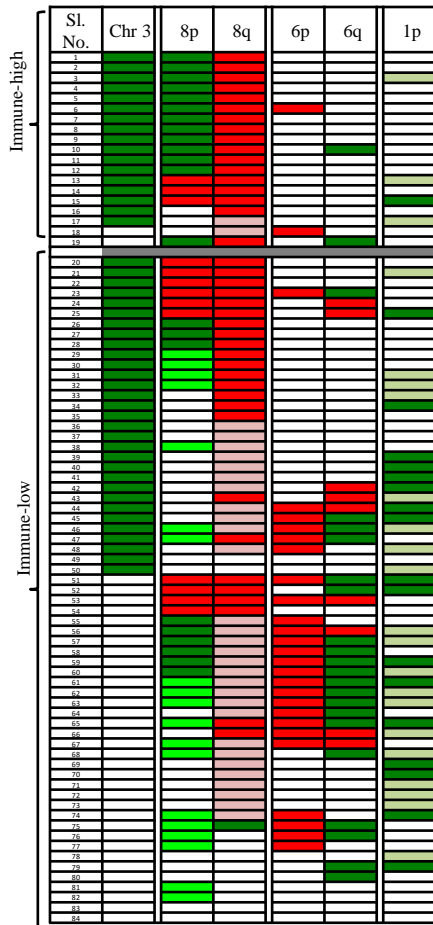

**Figure S3. Schematic representation of copy number alterations in immune-high and immune-low melanomas (n = 84).**

( ■ Loss ■ Gain ■ MYC gain ■ LZTS1 deletion ■ NBL1 deletion)

**(S4a)**

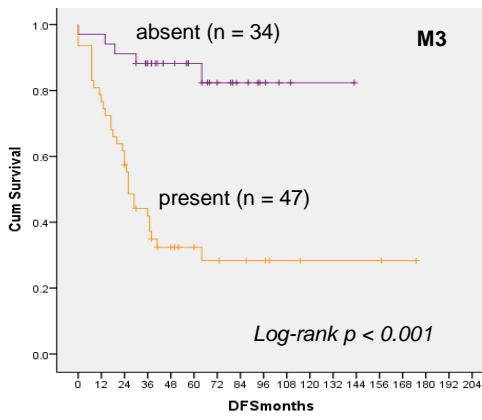

**(S4b)**

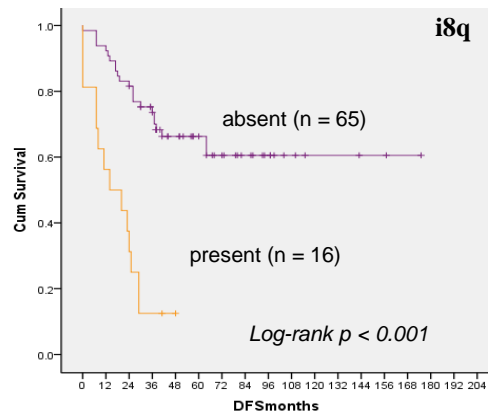

**(S4c)**

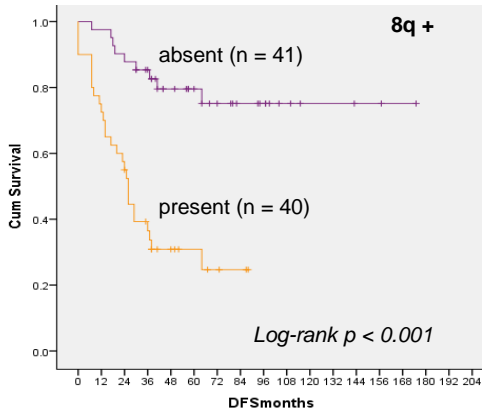

**(S4d)**

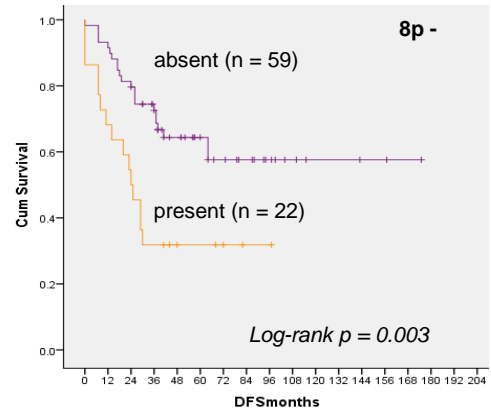

**(S4e)**

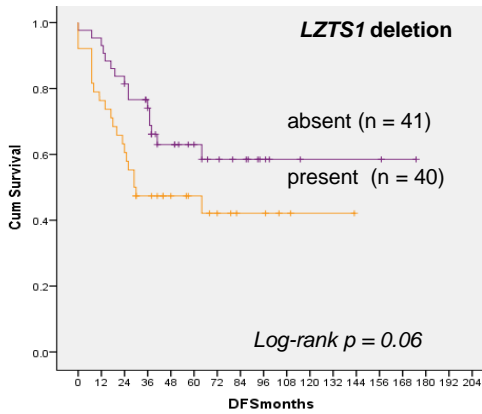

**(S4f)**

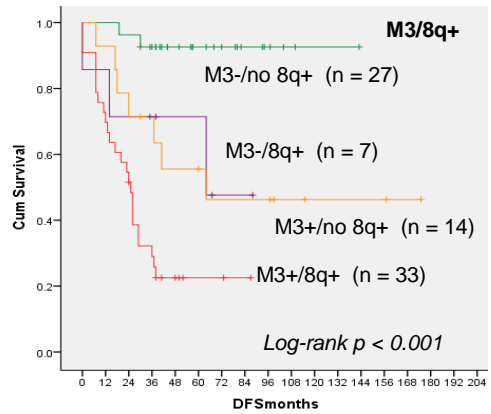

**Figure S4. Kaplan-Meier plots for the duration of DFS in uveal melanomas with different chromosomal aberrations**

**(S5a)**

| Risk-group          | M3           | 8q+ | $\Delta LZTS1$ | $\Delta NBL1$ | n (%)            | Metastases (%)   |
|---------------------|--------------|-----|----------------|---------------|------------------|------------------|
| <b>High</b>         |              |     |                |               | 2 (7.4)          | 2 (100)          |
|                     |              |     |                |               | 17 (63)          | 15 (88.2)        |
|                     |              |     |                |               | 7 (25.9)         | 6 (85.7)         |
|                     |              |     |                |               | 1 (3.7)          | 1 (100)          |
|                     | <b>Total</b> |     |                |               |                  | <b>27 (33.3)</b> |
| <b>Intermediate</b> |              |     |                |               | 7 (24.1)         | 2 (28.6)         |
|                     |              |     |                |               | 9 (31)           | 6 (66.7)         |
|                     |              |     |                |               | 1 (3.4)          | 0 (0)            |
|                     |              |     |                |               | 7 (24.1)         | 1 (14.3)         |
|                     |              |     |                |               | 3 (10.3)         | 1 (33.3)         |
|                     |              |     |                |               | 1 (3.4)          | 1 (100)          |
|                     |              |     |                |               | 1 (3.4)          | 1 (100)          |
| <b>Total</b>        |              |     |                |               | <b>29 (35.8)</b> | <b>12 (41.4)</b> |
| <b>Low</b>          |              |     |                |               | 3 (12)           | 0 (0)            |
|                     |              |     |                |               | 2 (8)            | 0 (0)            |
|                     |              |     |                |               | 8 (32)           | 0 (0)            |
|                     |              |     |                |               | 7 (28)           | 1 (14.3)         |
|                     |              |     |                |               | 5 (20)           | 0 (0)            |
| <b>Total</b>        |              |     |                |               | <b>25 (30.9)</b> | <b>1 (4)</b>     |

**(S5b)**

| Risk-group           | M3           | 8q+ | $\Delta LZTS1$ | $\Delta NBL1$ | n (%)            | Metastases (%)   |
|----------------------|--------------|-----|----------------|---------------|------------------|------------------|
| <b>High</b>          |              |     |                |               | 2 (7.4)          | 2 (100)          |
|                      |              |     |                |               | 17 (63)          | 15 (88.2)        |
|                      |              |     |                |               | 7 (25.9)         | 6 (85.7)         |
|                      |              |     |                |               | 1 (3.7)          | 1 (100)          |
|                      | <b>Total</b> |     |                |               |                  | <b>27 (33.3)</b> |
| <b>Intermedia</b>    |              |     |                |               | 1 (9.1)          | 0 (0)            |
|                      |              |     |                |               | 9 (81.8)         | 6 (66.7)         |
|                      |              |     |                |               | 1 (9.1)          | 1 (100)          |
| <b>te-high Total</b> |              |     |                |               | <b>11 (13.6)</b> | <b>7 (63.6)</b>  |
| <b>Intermedia</b>    |              |     |                |               | 7 (33.3)         | 2 (28.6)         |
|                      |              |     |                |               | 3 (14.3)         | 0 (0)            |
|                      |              |     |                |               | 1 (4.8)          | 1 (100)          |
|                      |              |     |                |               | 3 (14.3)         | 1 (33.3)         |
|                      |              |     |                |               | 7 (33.3)         | 1 (14.3)         |
| <b>te-low Total</b>  |              |     |                |               | <b>21 (25.9)</b> | <b>5 (23.8)</b>  |
| <b>Low</b>           |              |     |                |               | 2 (9.1)          | 0 (0)            |
|                      |              |     |                |               | 8 (36.4)         | 0 (0)            |
|                      |              |     |                |               | 7 (31.8)         | 1 (14.3)         |
|                      |              |     |                |               | 5 (22.7)         | 0 (0)            |
|                      | <b>Total</b> |     |                |               |                  | <b>22 (27.2)</b> |

**(S5c)**

| Risk-group          | Immune | M3 | 8q+ | $\Delta LZTS1$ | $\Delta NBL1$ | n(%)             | Metastases (%)   |
|---------------------|--------|----|-----|----------------|---------------|------------------|------------------|
| <b>High</b>         |        |    |     |                |               | 1 (3.7)          | 1 (100)          |
|                     |        |    |     |                |               | 11 (40.7)        | 9 (81.8)         |
|                     |        |    |     |                |               | 2 (7.4)          | 2 (100)          |
|                     |        |    |     |                |               | 1 (3.7)          | 1 (100)          |
|                     |        |    |     |                |               | 6 (22.2)         | 6 (100)          |
|                     |        |    |     |                |               | 5 (18.5)         | 4 (80)           |
|                     |        |    |     |                |               | 1 (3.7)          | 1 (100)          |
| <b>Total</b>        |        |    |     |                |               | <b>27 (33.3)</b> | <b>24 (88.9)</b> |
| <b>Intermediate</b> |        |    |     |                |               | 2 (6.9)          | 2 (100)          |
|                     |        |    |     |                |               | 1 (3.4)          | 1 (100)          |
|                     |        |    |     |                |               | 1 (3.4)          | 1 (100)          |
|                     |        |    |     |                |               | 5 (17.2)         | 0 (0)            |
|                     |        |    |     |                |               | 1 (3.4)          | 0 (0)            |
|                     |        |    |     |                |               | 8 (27.6)         | 5 (62.5)         |
|                     |        |    |     |                |               | 1 (3.4)          | 1 (100)          |
|                     |        |    |     |                |               | 3 (10.3)         | 1 (33.3)         |
|                     |        |    |     |                | 7 (24.1)      | 1 (14.3)         |                  |
| <b>Total</b>        |        |    |     |                |               | <b>29 (35.8)</b> | <b>12 (41.4)</b> |
| <b>Low</b>          |        |    |     |                |               | 1 (4)            | 0 (0)            |
|                     |        |    |     |                |               | 3 (12)           | 0 (0)            |
|                     |        |    |     |                |               | 2 (8)            | 0 (0)            |
|                     |        |    |     |                |               | 8 (32)           | 0 (0)            |
|                     |        |    |     |                |               | 7 (28)           | 1 (14.3)         |
|                     |        |    |     |                | 4 (16)        | 0 (0)            |                  |
| <b>Total</b>        |        |    |     |                |               | <b>25 (30.9)</b> | <b>1 (4)</b>     |

**(S5d)**

| Risk-group           | Immune | M3 | 8q+ | $\Delta LZTS1$ | $\Delta NBL1$ | n (%)            | Metastases (%)   |
|----------------------|--------|----|-----|----------------|---------------|------------------|------------------|
| <b>High</b>          |        |    |     |                |               | 1 (3.7)          | 1 (100)          |
|                      |        |    |     |                |               | 11 (40.7)        | 9 (81.8)         |
|                      |        |    |     |                |               | 2 (7.4)          | 2 (100)          |
|                      |        |    |     |                |               | 1 (3.7)          | 1 (100)          |
|                      |        |    |     |                |               | 6 (22.2)         | 6 (100)          |
|                      |        |    |     |                |               | 5 (18.5)         | 4 (80)           |
|                      |        |    |     |                |               | 1 (3.7)          | 1 (100)          |
| <b>Total</b>         |        |    |     |                |               | <b>27 (33.3)</b> | <b>24 (88.9)</b> |
| <b>Intermedia</b>    |        |    |     |                |               | 2 (15.4)         | 2 (100)          |
|                      |        |    |     |                |               | 1 (7.7)          | 1 (100)          |
|                      |        |    |     |                |               | 8 (61.5)         | 5 (62.5)         |
|                      |        |    |     |                |               | 1 (7.7)          | 0 (0)            |
|                      |        |    |     |                |               | 1 (7.7)          | 1 (100)          |
| <b>te-high Total</b> |        |    |     |                |               | <b>13 (16)</b>   | <b>9 (69.2)</b>  |
| <b>Intermedia</b>    |        |    |     |                |               | 1 (5.3)          | 1 (100)          |
|                      |        |    |     |                |               | 5 (26.3)         | 0 (0)            |
|                      |        |    |     |                |               | 3 (15.8)         | 0 (0)            |
|                      |        |    |     |                |               | 7 (36.8)         | 1 (14.3)         |
|                      |        |    |     |                |               | 3 (15.8)         | 1 (33.3)         |
| <b>te low Total</b>  |        |    |     |                |               | <b>19 (23.5)</b> | <b>3 (15.8)</b>  |
| <b>Low</b>           |        |    |     |                |               | 1 (4.5)          | 0 (0)            |
|                      |        |    |     |                |               | 2 (9.1)          | 0 (0)            |
|                      |        |    |     |                |               | 8 (36.4)         | 0 (0)            |
|                      |        |    |     |                |               | 7 (31.8)         | 1 (14.3)         |
|                      |        |    |     |                |               | 4 (18.2)         | 0 (0)            |
| <b>Total</b>         |        |    |     |                |               | <b>22 (27.2)</b> | <b>1 (4.5)</b>   |

**Figure S5. Schematic representation of alterations in CNA and immune-CNA models**

S5a and S5b: Alterations for tertile-based (S5a) and quartile-based (S5b) risk-groups in CNA-model. S5c and S5d: Alterations for tertile-based (S5c) and quartile-based (S5d) risk-groups in immune-CNA model.

In the tertile-based, the most common genetic profile in: high-risk group was M3+/8q+/ $\Delta LZTS1$  (19/27, 70.4%; 12 immune-high and 7 immune-low); intermediate risk-group was M3+/ $\Delta NBL1$  (9/29, 31%; one immune-high and eight immune-low); and low-risk group were  $\Delta LZTS1$  (8/25, 32%) and  $\Delta NBL1$  (7/25, 28%), both in immune-low tumors only. In the quartile-based, the most frequent alteration in intermediate-high group was M3+/ $\Delta NBL1$  (9/13, 69.2%) and in intermediate-low was co-deletion of  $\Delta LZTS1/\Delta NBL1$  (7/19, 36.8%).

( ■ CNA-present □ CNA-absent ■ immune-high ■ immune-low )

(S6a)

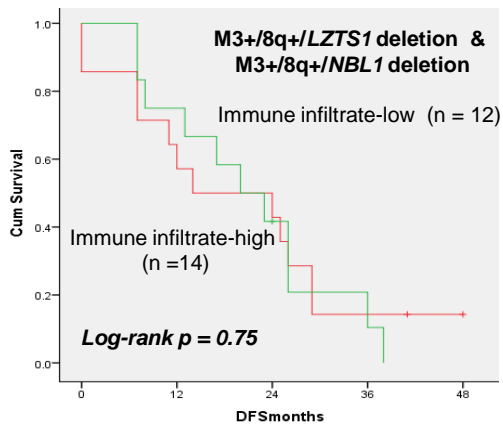

(S6b)

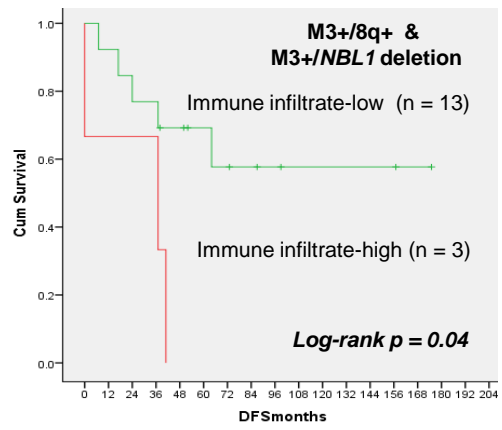

**Figure S6. Prognostic relevance of immune infiltrate in uveal melanomas with similar CNA**

S6a: Kaplan-Meier plots for the duration of DFS between immune infiltrate-high and immune infiltrate-low tumors in high-risk CNA

S6b: Kaplan-Meier plots for the duration of DFS between immune-high and immune-low tumors in intermediate-risk CNA

**(S7a)**

CNA model

**(S7b)**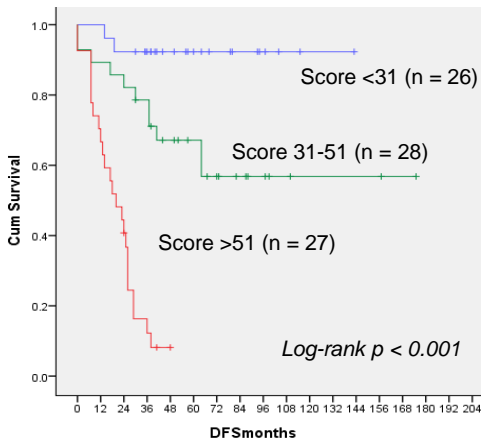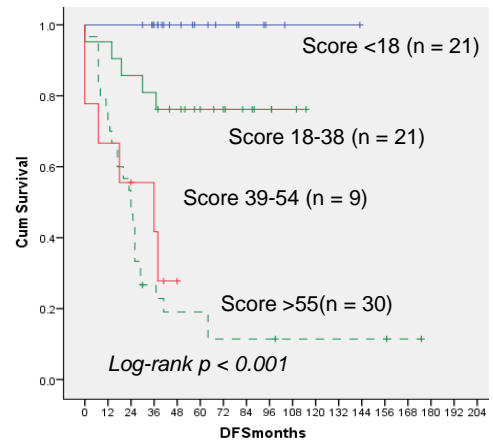**(S7c)**

Immune-CNA model

**(S7d)**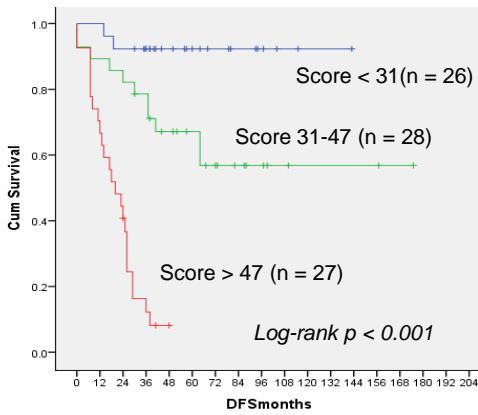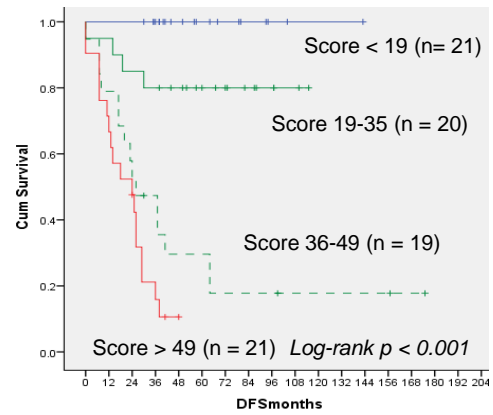

**Figure S7. Prognostic groups based on cross-validated multivariate models**

S7a and S7b: Kaplan-Meier plots for the duration of DFS based on cross-validated tertile-based (S7a) and quartile-based (S7b) risk-groups in CNA model

S7c and S7d: Kaplan-Meier plots for the duration of DFS based on cross-validated tertile-based (S7c) and quartile-based (S7d) risk-groups in immune-CNA model

**(S8a)**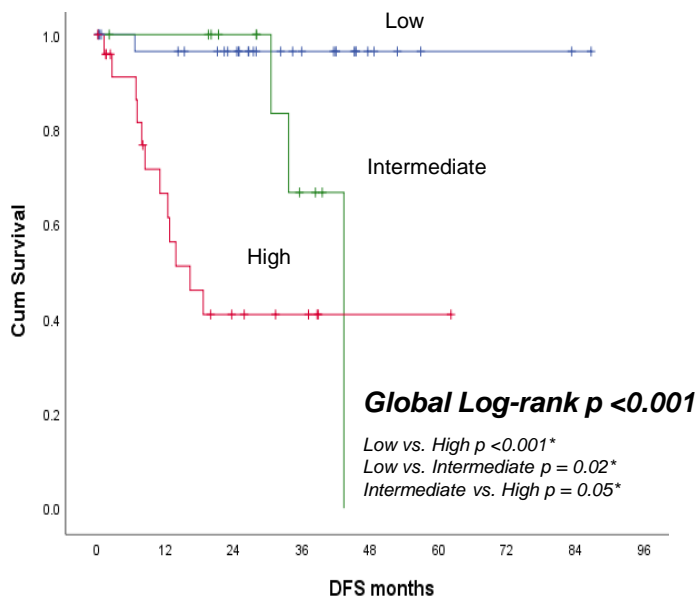**(S8b)**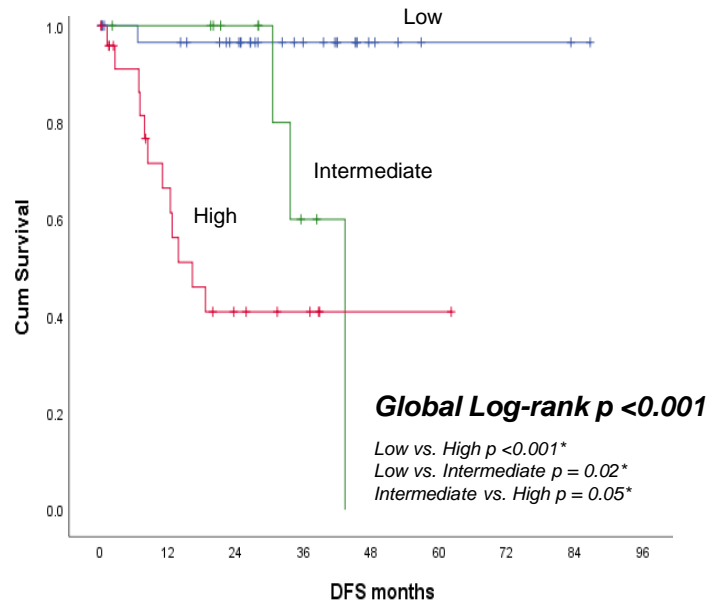**(S8c)**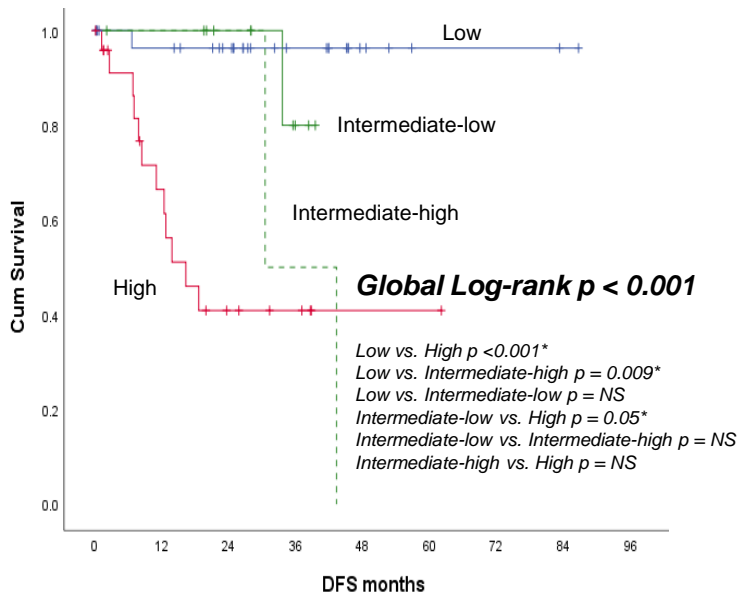**(S8d)**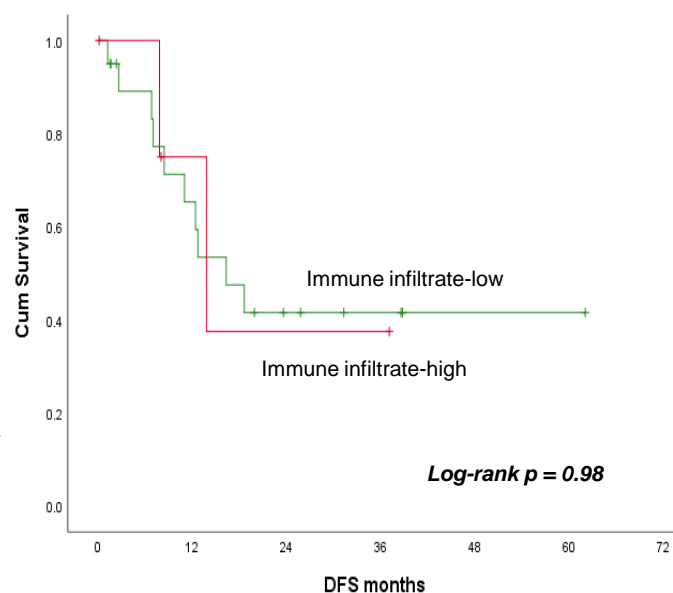

**Figure S8. External validation of CNA, immune-CNA and the impact of immune cell infiltration in TCGA data**

S8a: Kaplan-Meier plots for the duration of DFS between high, intermediate and low-risk groups of the CNA model

S8b: Kaplan-Meier plots for the duration of DFS between high, intermediate and low-risk groups of the immune-CNA model

S8c: Kaplan-Meier plots for the duration of DFS between high, intermediate-high, intermediate-low and low-risk groups of the immune-CNA model

S8d: Kaplan-Meier plots for the duration of DFS between immune infiltrate-high and immune infiltrate-low tumors with high-risk CNA

(\* p-value significant, NS: not significant)
