# Supplementary material for: DNA alteration‐based classification of uveal melanoma gives better prognostic stratification than immune infiltration, which has a neutral effect in high‐risk group
Source: PubMed Central journal article supplement (PMC6558590; doi:10.1002/cam4.2122), 2019-04-25
Supplement: CAM4-8-3036-s002.pdf [file CAM4-8-3036-s002.pdf]

**Table S1. Baseline details for tumor series**

| <i>Clinical features</i>          |              | Valid N | Not available |
|-----------------------------------|--------------|---------|---------------|
| <b>Age at diagnosis(years)</b>    |              | 89      | 0             |
| Mean(SD)†                         | 64.7(13.5)   |         |               |
| Median(Range)                     | 67(35-90)    |         |               |
| upto 60 years                     | 32(36%)      |         |               |
| > 60 years                        | 57(64%)      |         |               |
| <b>Gender</b>                     |              | 89      | 0             |
| Female                            | 43(48.3%)    |         |               |
| Male                              | 46(51.7%)    |         |               |
| <b>Stage</b>                      |              | 78      | 11(12.4%)     |
| IIA                               | 6(7.7%)      |         |               |
| IIB                               | 20(25.6%)    |         |               |
| IIIA                              | 17(21.8%)    |         |               |
| IIIB                              | 30(38.5%)    |         |               |
| IIIC                              | 1(1.3%)      |         |               |
| IV                                | 4(5.1%)      |         |               |
| <b>T category</b>                 |              | 77      | 12(13.5%)     |
| T1c                               | 1(1.3%)      |         |               |
| T2a                               | 5(6.5%)      |         |               |
| T2b                               | 1(1.3%)      |         |               |
| T3a                               | 20(25.9%)    |         |               |
| T3b                               | 10(13%)      |         |               |
| T3c                               | 2(2.6%)      |         |               |
| T4a                               | 5(6.5%)      |         |               |
| T4b                               | 31(40.3%)    |         |               |
| T4c                               | 1(1.3%)      |         |               |
| T4d                               | 1(1.3%)      |         |               |
| <b>Basal diameter (mm)</b>        |              | 77      | 12(13.5%)     |
| Mean(SD)                          | 17.8(3.1)    |         |               |
| Median(Range)                     | 18(7-25)     |         |               |
| upto 15mm                         | 16(20.8%)    |         |               |
| >15mm                             | 61(79.2%)    |         |               |
| <b>Thickness(mm)</b>              |              | 84      | 5(5.6%)       |
| Mean(SD)                          | 10.5(3.1)    |         |               |
| Median(Range)                     | 11.1(1.6-18) |         |               |
| upto 8mm                          | 16(19%)      |         |               |
| >8mm                              | 68(81%)      |         |               |
| <b>Location</b>                   |              | 89      | 0             |
| Choroid                           | 37(41.6%)    |         |               |
| Choroid & ciliary body            | 52(58.4%)    |         |               |
| <b>Retinal detachment</b>         |              | 81      | 8(9%)         |
| absent                            | 2(2.5%)      |         |               |
| present                           | 79(97.5%)    |         |               |
| <b>Extrascleral extension</b>     |              | 89      | 0             |
| absent                            | 82(92.1%)    |         |               |
| present                           | 7(7.9%)      |         |               |
| <b><i>Histologic features</i></b> |              |         |               |
| <b>Epithelioid component (%)</b>  |              | 88      | 1(1.1%)       |
| Mean(SD)                          | 29.7(31.2)   |         |               |
| Median(Range)                     | 20(0-100)    |         |               |
| upto 25%                          | 51(58%)      |         |               |
| > 25%                             | 37(42%)      |         |               |
| <b>Mitoses (40hpf)</b>            |              | 88      | 1(1.1%)       |
| Mean(SD)                          | 12.7(11)     |         |               |
| Median(Range)                     | 11(0-54)     |         |               |
| upto 10/40hpf                     | 43(48.9%)    |         |               |
| >10/40hpf                         | 45(51.1%)    |         |               |
| <b>Pigment</b>                    |              | 89      | 0             |
| Mean(SD)                          | 16.2(21.6)   |         |               |
| Median(Range)                     | 7.5(0-100)   |         |               |
| upto 25%                          | 69(77.5%)    |         |               |
| >25%                              | 20(22.5%)    |         |               |
| <b>Necrosis</b>                   |              | 89      | 0             |
| absent                            | 78(87.6%)    |         |               |
| present                           | 11(12.4%)    |         |               |

†SD: standard deviation

**Table S2. Overexpressed and underexpressed significant probe sets identified from HCL and immune gene analysis**

**Probe sets overexpressed in immune gene-high tumors**

| <b>HCL significant genes*</b>     |              |                    |                 |             |
|-----------------------------------|--------------|--------------------|-----------------|-------------|
| Gene symbol                       | Probeset ID  | Average expression |                 | Fold change |
|                                   |              | Immune gene-high   | Immune gene-low |             |
| GBP1                              | 202269_x_at  | 1259.56            | 87.36           | 14.4        |
| CCL5                              | 204655_at    | 498.46             | 36.78           | 13.6        |
| RARRES3                           | 204070_at    | 1792.2             | 147.55          | 12.1        |
| PSMB9                             | 204279_at    | 1214.04            | 101.88          | 11.9        |
| PRF1                              | 214617_at    | 306.26             | 27.53           | 11.1        |
| CD74                              | 1567628_at   | 2516.48            | 299.4           | 8.4         |
| FGL2                              | 227265_at    | 628.62             | 76.89           | 8.2         |
| C1QA                              | 218232_at    | 2589.12            | 323             | 8.0         |
| CCL4                              | 204103_at    | 195.66             | 26.99           | 7.2         |
| HLA-DQA1 /// HLA-I                | 212671_s_at  | 2340.42            | 333.85          | 7.0         |
| HLA-DRA                           | 210982_s_at  | 3599.94            | 518.12          | 6.9         |
| C1QB                              | 202953_at    | 2988.62            | 440.41          | 6.8         |
| UBE2L6                            | 201649_at    | 1520.18            | 224.7           | 6.8         |
| GIMAP4                            | 219243_at    | 324.84             | 51.61           | 6.3         |
| FGL2                              | 204834_at    | 363.92             | 60.81           | 6.0         |
| CD27                              | 206150_at    | 250.24             | 43.21           | 5.8         |
| HLA-DPA1                          | 211991_s_at  | 4409.98            | 768.5           | 5.7         |
| GBP2                              | 202748_at    | 409.06             | 72.98           | 5.6         |
| C1QC                              | 225353_s_at  | 3381.78            | 615.82          | 5.5         |
| HLA-DRB1 /// HLA-I                | 215193_x_at  | 5288               | 990.45          | 5.3         |
| IRF1                              | 202531_at    | 408.84             | 79.3            | 5.2         |
| SLC15A3                           | 219593_at    | 529.42             | 104.63          | 5.1         |
| APOL6                             | 219716_at    | 305.32             | 60.83           | 5.0         |
| HLA-G                             | 211530_x_at  | 4790.08            | 958.17          | 5.0         |
| MPEG1                             | 226818_at    | 767.9              | 156.33          | 4.9         |
| MPEG1                             | 226841_at    | 394.5              | 81.08           | 4.9         |
| APOL6                             | 1557116_at   | 391.02             | 82.45           | 4.7         |
| HLA-DRB1 /// HLA-I                | 209312_x_at  | 6458.72            | 1366.29         | 4.7         |
| STAT1                             | 200887_s_at  | 3630.14            | 784.04          | 4.6         |
| HLA-DRB6                          | 217362_x_at  | 511.58             | 113.56          | 4.5         |
| HLA-DRB1 /// HLA-I                | 204670_x_at  | 5147.34            | 1174.07         | 4.4         |
| APOL6                             | 241869_at    | 333.38             | 83.13           | 4.0         |
| HLA-E                             | 200904_at    | 4159.3             | 1080.39         | 3.8         |
| BATF2                             | 228439_at    | 225.46             | 58.8            | 3.8         |
| TRIM22                            | 213293_s_at  | 950                | 252.46          | 3.8         |
| PSMB10                            | 202659_at    | 647.56             | 173.88          | 3.7         |
| TAPBPL                            | 218747_s_at  | 283.64             | 76.73           | 3.7         |
| HLA-E                             | 200905_x_at  | 7782.54            | 2237.12         | 3.5         |
| HCLS1                             | 202957_at    | 365.9              | 109.9           | 3.3         |
| TAPBPL                            | 218746_at    | 257.84             | 78.95           | 3.3         |
| HLA-J                             | 217436_x_at  | 3100.42            | 986.82          | 3.1         |
| RNASE6                            | 213566_at    | 405.34             | 136.83          | 3.0         |
| FKBP11                            | 219118_at    | 1039.04            | 360.55          | 2.9         |
| FAM119A                           | 235931_at    | 87.98              | 32.66           | 2.7         |
| <b>From immune gene analysis*</b> |              |                    |                 |             |
| CXCL9                             | 203915_at    | 1262.9             | 36.8            | 34.3        |
| IDO1                              | 210029_at    | 610.8              | 18.0            | 33.9        |
| IL32                              | 203828_s_at  | 191.0              | 6.2             | 30.9        |
| IGHM                              | 216491_x_at  | 263.3              | 9.5             | 27.8        |
| NKG7                              | 213915_at    | 283.9              | 12.3            | 23.1        |
| GBP1                              | 202270_at    | 859.6              | 37.3            | 23.1        |
| GBP1                              | 231577_s_at  | 1953.0             | 96.4            | 20.3        |
| CCL5                              | 1405_i_at    | 648.5              | 32.9            | 19.7        |
| GABBR1 /// UBD                    | 205890_s_at  | 609.9              | 33.6            | 18.1        |
| TRBC1                             | 211796_s_at  | 569.3              | 32.9            | 17.3        |
| TRAC                              | 209671_x_at  | 468.1              | 28.8            | 16.2        |
| TRAC /// TRAJ17 ///               | 210972_x_at  | 617.4              | 38.5            | 16.0        |
| IKZF3                             | 227030_at    | 122.7              | 7.8             | 15.7        |
| GBP1                              | 202269_x_at  | 1259.6             | 87.4            | 14.4        |
| CCL5                              | 1555759_a_at | 727.4              | 52.9            | 13.7        |
| APOL1                             | 209546_s_at  | 200.6              | 14.7            | 13.7        |
| ADAMDEC1                          | 206134_at    | 409.4              | 30.0            | 13.6        |

|                    |              |        |        |      |
|--------------------|--------------|--------|--------|------|
| CCL5               | 204655_at    | 498.5  | 36.8   | 13.6 |
| LCK                | 204891_s_at  | 127.0  | 10.5   | 12.1 |
| STAT1              | 209969_s_at  | 693.5  | 57.9   | 12.0 |
| PSMB9              | 204279_at    | 1214.0 | 101.9  | 11.9 |
| CD8A               | 205758_at    | 277.4  | 24.6   | 11.3 |
| PRF1               | 214617_at    | 306.3  | 27.5   | 11.1 |
| LYZ                | 1555745_a_at | 687.2  | 63.1   | 10.9 |
| LAG3               | 206486_at    | 106.3  | 10.0   | 10.6 |
| PTPRCAP            | 204960_at    | 91.1   | 8.7    | 10.4 |
| NFATC2             | 226991_at    | 67.7   | 7.0    | 9.7  |
| TRBC1              | 210915_x_at  | 486.1  | 51.8   | 9.4  |
| CD2                | 205831_at    | 367.9  | 39.3   | 9.4  |
| C1S                | 1555229_a_at | 240.2  | 27.6   | 8.7  |
| CD74               | 1567628_at   | 2516.5 | 299.4  | 8.4  |
| ERAP1              | 214012_at    | 84.1   | 10.1   | 8.3  |
| IL12RB1            | 1552584_at   | 214.1  | 25.8   | 8.3  |
| CD38               | 205692_s_at  | 115.8  | 14.3   | 8.1  |
| C1QA               | 218232_at    | 2589.1 | 323.0  | 8.0  |
| AIF1               | 209901_x_at  | 329.5  | 41.2   | 8.0  |
| IL21R              | 219971_at    | 28.3   | 3.6    | 8.0  |
| INPP5D             | 203331_s_at  | 18.5   | 2.4    | 7.9  |
| LCK                | 204890_s_at  | 71.5   | 9.4    | 7.6  |
| SH2D1A             | 210116_at    | 56.5   | 7.7    | 7.4  |
| CORO1A             | 209083_at    | 185.4  | 25.6   | 7.2  |
| CCL4               | 204103_at    | 195.7  | 27.0   | 7.2  |
| HLA-DQA1 /// HLA-D | 212671_s_at  | 2340.4 | 333.9  | 7.0  |
| SLAMF7             | 222838_at    | 192.6  | 27.6   | 7.0  |
| HLA-DRA            | 210982_s_at  | 3599.9 | 518.1  | 6.9  |
| GZMB               | 210164_at    | 100.6  | 14.5   | 6.9  |
| C1QB               | 202953_at    | 2988.6 | 440.4  | 6.8  |
| UBE2L6             | 201649_at    | 1520.2 | 224.7  | 6.8  |
| CD3D               | 213539_at    | 236.7  | 36.3   | 6.5  |
| THEMIS             | 1558971_at   | 21.8   | 3.7    | 5.9  |
| CD27               | 206150_at    | 250.2  | 43.2   | 5.8  |
| TRBC1              | 213193_x_at  | 532.1  | 92.4   | 5.8  |
| HLA-DPA1           | 211991_s_at  | 4410.0 | 768.5  | 5.7  |
| FYB                | 227266_s_at  | 199.8  | 35.6   | 5.6  |
| GBP2               | 202748_at    | 409.1  | 73.0   | 5.6  |
| C1QC               | 225353_s_at  | 3381.8 | 615.8  | 5.5  |
| TLR8               | 229560_at    | 121.7  | 22.5   | 5.4  |
| TAP1               | 202307_s_at  | 1536.4 | 284.2  | 5.4  |
| HLA-DRB1 /// HLA-D | 215193_x_at  | 5288.0 | 990.5  | 5.3  |
| IRF1               | 202531_at    | 408.8  | 79.3   | 5.2  |
| TNFSF10            | 202688_at    | 196.9  | 38.4   | 5.1  |
| HLA-G              | 211530_x_at  | 4790.1 | 958.2  | 5.0  |
| C1S                | 208747_s_at  | 843.3  | 170.3  | 5.0  |
| MPEG1              | 226818_at    | 767.9  | 156.3  | 4.9  |
| MPEG1              | 226841_at    | 394.5  | 81.1   | 4.9  |
| FYB                | 205285_s_at  | 144.7  | 29.9   | 4.8  |
| ITGAL              | 1554240_a_at | 152.2  | 31.9   | 4.8  |
| IGSF6              | 206420_at    | 216.2  | 45.4   | 4.8  |
| HLA-DRB1 /// HLA-D | 209312_x_at  | 6458.7 | 1366.3 | 4.7  |
| LY9                | 210370_s_at  | 21.9   | 4.7    | 4.7  |
| STAT1              | 200887_s_at  | 3630.1 | 784.0  | 4.6  |
| HLA-DMA            | 217478_s_at  | 1423.4 | 312.0  | 4.6  |
| NLRC5              | 226474_at    | 289.8  | 64.1   | 4.5  |
| HLA-DRB6           | 217362_x_at  | 511.6  | 113.6  | 4.5  |
| SIGLEC1            | 219519_s_at  | 137.8  | 30.8   | 4.5  |
| CYTIP              | 209606_at    | 96.5   | 21.9   | 4.4  |
| HLA-DRB1 /// HLA-D | 204670_x_at  | 5147.3 | 1174.1 | 4.4  |
| AIF1               | 213095_x_at  | 258.0  | 58.9   | 4.4  |
| BTN3A3             | 204821_at    | 895.4  | 205.2  | 4.4  |
| BTN3A3             | 38241_at     | 756.8  | 182.4  | 4.2  |
| LST1               | 215633_x_at  | 77.5   | 19.1   | 4.1  |
| NCF4               | 207677_s_at  | 53.9   | 13.5   | 4.0  |
| AIF1               | 215051_x_at  | 329.7  | 83.2   | 4.0  |
| XAF1               | 228617_at    | 369.9  | 93.9   | 3.9  |
| IL10RA             | 204912_at    | 265.9  | 68.1   | 3.9  |
| HLA-E              | 200904_at    | 4159.3 | 1080.4 | 3.8  |
| BATF2              | 228439_at    | 225.5  | 58.8   | 3.8  |
| TRIM22             | 213293_s_at  | 950.0  | 252.5  | 3.8  |

|                   |              |         |        |     |
|-------------------|--------------|---------|--------|-----|
| CARD16 /// CASP1  | 1552703_s_at | 248.9   | 66.2   | 3.8 |
| PSMB10            | 202659_at    | 647.6   | 173.9  | 3.7 |
| TAPBPL            | 218747_s_at  | 283.6   | 76.7   | 3.7 |
| RASSF5            | 223322_at    | 174.5   | 47.7   | 3.7 |
| LST1              | 214181_x_at  | 103.2   | 28.3   | 3.6 |
| FPR3              | 230422_at    | 165.9   | 46.7   | 3.6 |
| HLA-DMB           | 203932_at    | 646.5   | 183.3  | 3.5 |
| LILRB2            | 207697_x_at  | 102.3   | 29.1   | 3.5 |
| IFIT3             | 229450_at    | 847.5   | 242.6  | 3.5 |
| HLA-E             | 200905_x_at  | 7782.5  | 2237.1 | 3.5 |
| CD86              | 210895_s_at  | 161.7   | 46.9   | 3.4 |
| CD48              | 204118_at    | 116.7   | 34.6   | 3.4 |
| XAF1              | 206133_at    | 153.8   | 45.9   | 3.4 |
| HLA-DOA           | 206313_at    | 45.3    | 13.6   | 3.3 |
| HCLS1             | 202957_at    | 365.9   | 109.9  | 3.3 |
| CARD16            | 1552701_a_at | 224.3   | 67.4   | 3.3 |
| SECTM1            | 213716_s_at  | 191.9   | 58.1   | 3.3 |
| TAPBPL            | 218746_at    | 257.8   | 79.0   | 3.3 |
| TNFRSF1B          | 203508_at    | 166.2   | 51.3   | 3.2 |
| AMICA1            | 228094_at    | 54.7    | 17.1   | 3.2 |
| HLA-J             | 217436_x_at  | 3100.4  | 986.8  | 3.1 |
| ITGAL             | 213475_s_at  | 90.3    | 29.4   | 3.1 |
| PSME2             | 201762_s_at  | 2069.5  | 681.6  | 3.0 |
| PRF1              | 1553681_a_at | 155.0   | 51.3   | 3.0 |
| CD70              | 206508_at    | 80.5    | 27.2   | 3.0 |
| HLA-E             | 217456_x_at  | 2502.3  | 863.9  | 2.9 |
| TMSB4X            | 216438_s_at  | 5518.4  | 1915.0 | 2.9 |
| IL15RA            | 207375_s_at  | 70.4    | 25.2   | 2.8 |
| TRIM69            | 1568592_at   | 610.6   | 218.5  | 2.8 |
| TAPBP             | 208829_at    | 1997.4  | 723.2  | 2.8 |
| LILRB1            | 211336_x_at  | 86.2    | 31.4   | 2.7 |
| HLA-B             | 211911_x_at  | 10442.8 | 3816.9 | 2.7 |
| LAIR1             | 208071_s_at  | 60.1    | 22.8   | 2.6 |
| CAPN10            | 219333_s_at  | 38.4    | 14.6   | 2.6 |
| PTPN6             | 206687_s_at  | 159.8   | 61.1   | 2.6 |
| IRF9              | 203882_at    | 798.8   | 312.4  | 2.6 |
| CASP1             | 206011_at    | 87.3    | 34.7   | 2.5 |
| LGDN              | 201212_at    | 1406.5  | 561.7  | 2.5 |
| CLEC4A            | 219947_at    | 39.8    | 16.2   | 2.5 |
| HLA-B             | 208729_x_at  | 7820.4  | 3272.1 | 2.4 |
| CD68              | 203507_at    | 123.7   | 51.9   | 2.4 |
| C2                | 203052_at    | 1113.0  | 473.4  | 2.4 |
| CD14              | 201743_at    | 1008.3  | 431.3  | 2.3 |
| DOCK8             | 225502_at    | 253.0   | 109.3  | 2.3 |
| HLA-G             | 211528_x_at  | 6898.4  | 3124.2 | 2.2 |
| OAS3              | 218400_at    | 258.5   | 129.1  | 2.0 |
| NCF4              | 205147_x_at  | 71.9    | 36.6   | 2.0 |
| SP110             | 209761_s_at  | 388.0   | 225.8  | 1.7 |
| ABHD16A /// LY6G6 | 224756_s_at  | 466.5   | 271.7  | 1.7 |
| HLA-C             | 216526_x_at  | 9153.9  | 5455.3 | 1.7 |
| NLK               | 222590_s_at  | 118.8   | 72.1   | 1.6 |
| B2M               | 216231_s_at  | 12216.2 | 7478.4 | 1.6 |
| HLA-C             | 208812_x_at  | 9160.0  | 5746.7 | 1.6 |
| SNX1              | 214531_s_at  | 358.3   | 227.6  | 1.6 |
| EHD1              | 209039_x_at  | 203.1   | 132.4  | 1.5 |
| PSMC2             | 201067_at    | 340.9   | 242.1  | 1.4 |
| B2M               | 201891_s_at  | 10258.1 | 7539.3 | 1.4 |

***Probe sets underexpressed in immune gene-high tumors***

| <b>From immune gene analysis*</b> |             |                    |                        |             |
|-----------------------------------|-------------|--------------------|------------------------|-------------|
| Gene symbol                       | Probeset ID | Average expression |                        | Fold change |
|                                   |             | Immune<br>high     | gene-<br>Immune<br>low |             |
| ANTXR1                            | 220093_at   | 2.1                | 14.3                   | 0.1         |
| RBM15                             | 232971_at   | 1.5                | 9.9                    | 0.2         |
| CFHR3                             | 1570228_at  | 2.1                | 12.0                   | 0.2         |
| OCLN                              | 209925_at   | 3.0                | 16.5                   | 0.2         |
| OPRM1                             | 207994_s_at | 1.2                | 5.9                    | 0.2         |
| PDGFD                             | 219304_s_at | 41.2               | 199.7                  | 0.2         |
| SLC5A8                            | 237503_at   | 2.0                | 7.1                    | 0.3         |
| SCARA5                            | 1554705_at  | 1.4                | 4.8                    | 0.3         |
| CD44                              | 217523_at   | 134.9              | 269.5                  | 0.5         |
| SOS2                              | 217644_s_at | 20.2               | 38.1                   | 0.5         |
| NRARP                             | 226499_at   | 53.1               | 96.7                   | 0.5         |

\* The p-values of all genes was highly significant

**Table S3. Pathways associated with overexpressed and underexpressed genes**

| <i>Overexpressed genes</i>                                                 |                   |                    |                |
|----------------------------------------------------------------------------|-------------------|--------------------|----------------|
| <b>Pathway</b>                                                             | <b>Gene count</b> | <b>Genes ratio</b> | <b>p-value</b> |
| Immune System                                                              | 48                | 4.3                | 1.10E-22       |
| Antigen processing and presentation                                        | 16                | 22.5               | 3.24E-17       |
| Adaptive Immune System                                                     | 31                | 5.1                | 1.60E-15       |
| Allograft rejection                                                        | 12                | 34.3               | 2.22E-15       |
| Graft-versus-host disease                                                  | 12                | 32.4               | 3.88E-15       |
| Type I diabetes mellitus                                                   | 12                | 29.3               | 1.36E-14       |
| Autoimmune thyroid disease                                                 | 12                | 24.0               | 1.69E-13       |
| Viral myocarditis                                                          | 12                | 21.4               | 6.55E-13       |
| Staphylococcus aureus infection                                            | 11                | 20.8               | 1.12E-11       |
| Interferon Signaling                                                       | 15                | 9.5                | 6.24E-11       |
| Interferon gamma signaling                                                 | 11                | 17.5               | 6.93E-11       |
| Cytokine Signaling in Immune system                                        | 18                | 6.7                | 9.20E-11       |
| Cell adhesion molecules (CAMs)                                             | 14                | 9.7                | 2.02E-10       |
| Natural killer cell mediated cytotoxicity                                  | 13                | 10.0               | 7.72E-10       |
| Antigen processing-Cross presentation                                      | 11                | 13.8               | 7.73E-10       |
| ER-Phagosome pathway                                                       | 10                | 15.9               | 1.35E-09       |
| Immunoregulatory interactions between a lymphoid and a non-lymphoid cell   | 10                | 14.1               | 4.34E-09       |
| Phagosome                                                                  | 13                | 8.6                | 4.35E-09       |
| Antigen Presentation: Folding, assembly and peptide loading of class I MHC | 7                 | 29.2               | 9.31E-09       |
| Interferon alpha/beta signaling                                            | 9                 | 15.3               | 1.46E-08       |
| <i>Underexpressed genes</i>                                                |                   |                    |                |
| <b>Pathway</b>                                                             | <b>Gene count</b> | <b>Genes ratio</b> | <b>p-value</b> |
| Prostate cancer                                                            | 2                 | 2%                 | 3.49E-03       |
| Hepatitis C                                                                | 2                 | 1%                 | 4.02E-03       |
| Integrin signaling pathway                                                 | 2                 | 2%                 | 4.46E-03       |
| Regulation of actin cytoskeleton                                           | 2                 | 1%                 | 6.55E-03       |
| Gap junction                                                               | 2                 | 2%                 | 6.68E-03       |
| Focal adhesion                                                             | 2                 | 1%                 | 7.08E-03       |
| EGFR1                                                                      | 2                 | 0%                 | 2.65E-02       |

**Table S4.** Gene ontology terms associated with overexpressed and underexpressed genes

| GO term                                                                        | GO ID      | Gene count | Gene ratio | p-value  |
|--------------------------------------------------------------------------------|------------|------------|------------|----------|
| <i>Overexpressed genes</i>                                                     |            |            |            |          |
| <b>Biological process</b>                                                      |            |            |            |          |
| Immune response                                                                | GO:0006955 | 32         | 8.7        | 9.53E-26 |
| Innate immune response                                                         | GO:0045087 | 45         | 3.3        | 2.99E-20 |
| APP <sup>†</sup> of peptide antigen via MHC class I                            | GO:0002474 | 14         | 14.1       | 2.15E-13 |
| Interferon-gamma-mediated signaling pathway                                    | GO:0060333 | 12         | 19.7       | 3.19E-13 |
| Antigen processing and presentation                                            | GO:0019882 | 12         | 18.8       | 4.73E-13 |
| Cytokine-mediated signaling pathway                                            | GO:0019221 | 18         | 7.2        | 1.09E-12 |
| APP <sup>†</sup> of exogenous peptide antigen via MHC class I, TAP-dependent   | GO:0002479 | 11         | 14.7       | 8.92E-11 |
| APP <sup>†</sup> of exogenous peptide antigen via MHC class I                  | GO:0042590 | 11         | 13.9       | 1.41E-10 |
| Defense response to virus                                                      | GO:0051607 | 13         | 8.9        | 2.96E-10 |
| Type I interferon signaling pathway                                            | GO:0060337 | 10         | 15.9       | 3.19E-10 |
| <b>Cellular component</b>                                                      |            |            |            |          |
| MHC class I protein complex                                                    | GO:0042612 | 6          | 50.0       | 2.62E-09 |
| Integral component of luminal side of endoplasmic reticulum membrane           | GO:0071556 | 7          | 29.2       | 4.81E-09 |
| External side of plasma membrane                                               | GO:0009897 | 13         | 6.8        | 6.98E-09 |
| MHC class II protein complex                                                   | GO:0042613 | 6          | 37.5       | 1.57E-08 |
| ER to Golgi transport vesicle membrane                                         | GO:0012507 | 7          | 21.9       | 3.25E-08 |
| <b>Molecular function</b>                                                      |            |            |            |          |
| Peptide antigen binding                                                        | GO:0042605 | 8          | 30.8       | 1.73E-10 |
| Protein binding                                                                | GO:0005515 | 90         | 0.9        | 5.32E-09 |
| MHC class I protein binding                                                    | GO:0042288 | 5          | 41.7       | 2.16E-07 |
| MHC class II protein complex binding                                           | GO:0023026 | 5          | 31.3       | 1.07E-06 |
| CCR5 chemokine receptor binding                                                | GO:0031730 | 3          | 50.0       | 8.51E-05 |
| <i>Underexpressed genes</i>                                                    |            |            |            |          |
| GO term                                                                        | GO ID      | Gene Count | Gene ratio | p-value  |
| <b>Biological process</b>                                                      |            |            |            |          |
| Negative regulation of Wnt protein secretion                                   | GO:0061358 | 1          | 100%       | 1.46E-02 |
| Positive regulation of ERK1 and ERK2 cascade                                   | GO:0070374 | 2          | 2%         | 1.63E-02 |
| Cellular response to morphine                                                  | GO:0071315 | 1          | 50%        | 1.75E-02 |
| Positive regulation of monocyte aggregation                                    | GO:1900625 | 1          | 50%        | 1.75E-02 |
| Wound healing involved in inflammatory response                                | GO:0002246 | 1          | 50%        | 1.75E-02 |
| Blood vessel endothelial cell proliferation involved in sprouting angiogenesis | GO:0002043 | 1          | 25%        | 2.19E-02 |
| Iron ion transmembrane transport                                               | GO:0034755 | 1          | 25%        | 2.19E-02 |
| Positive regulation of heterotypic cell-cell adhesion                          | GO:0034116 | 1          | 25%        | 2.19E-02 |
| Positive regulation of transcription of Notch receptor target                  | GO:0007221 | 1          | 25%        | 2.19E-02 |
| Monocyte aggregation                                                           | GO:0070487 | 1          | 33%        | 2.19E-02 |
| <b>Cellular component</b>                                                      |            |            |            |          |
| Apicolateral plasma membrane                                                   | GO:0016327 | 1          | 9%         | 2.41E-02 |
| Membrane                                                                       | GO:0016020 | 5          | 0%         | 2.55E-02 |
| Apical plasma membrane                                                         | GO:0016324 | 2          | 1%         | 2.59E-02 |
| Lamellipodium membrane                                                         | GO:0031258 | 1          | 7%         | 2.61E-02 |
| Filopodium membrane                                                            | GO:0031527 | 1          | 8%         | 2.64E-02 |
| <b>Molecular function</b>                                                      |            |            |            |          |
| Beta-endorphin receptor activity                                               | GO:0004979 | 1          | 100%       | 1.46E-02 |
| Ferritin receptor activity                                                     | GO:0070287 | 1          | 100%       | 1.46E-02 |
| Morphine receptor activity                                                     | GO:0038047 | 1          | 100%       | 1.46E-02 |
| Thiopurine S-methyltransferase activity                                        | GO:0008119 | 1          | 50%        | 1.75E-02 |
| Hyaluronoglucosaminidase activity                                              | GO:0004415 | 1          | 14%        | 2.27E-02 |

†APP: Antigen processing and presentation

**Table S5.** List of cancer germline genes, melanocyte differentiation genes, genes associated with pigmentation, melanosome and eye pigmentation

| Cancer-testis genes <sup>a</sup>                                  | Melanocyte differentiation genes <sup>b</sup> | Pigmentation <sup>c</sup> | Melanosome <sup>c</sup> |
|-------------------------------------------------------------------|-----------------------------------------------|---------------------------|-------------------------|
| ACRBP                                                             | DCT                                           | ADAMTS20                  | AHCY                    |
| ACTL8                                                             | DCT                                           | AP1M1                     | ANXA11                  |
| ADAM29                                                            | DCT                                           | AP3D1                     | ANXA2P2                 |
| AKAP3                                                             | MLANA                                         | ARL6                      | ANXA6                   |
| AKAP4                                                             | MLANA                                         | ASIP                      | ATP1A1                  |
| ARX                                                               | TYR                                           | BBS4                      | ATP6V1B2                |
| ATAD2                                                             | TYRP1                                         | BBS5                      | ATP6V1G2                |
| BAGE                                                              | PMEL/GP100                                    | BBS7                      | BSG                     |
| BAGE2 /// BAGE3 /// BAGE5 /// KMT2C                               | GPR143/OA1                                    | BCL2                      | CALU                    |
| BAGE2 /// BAGE4                                                   | RAB38/NY-MEL-1                                | BCL2L1                    | CANX                    |
| C15orf60                                                          |                                               | BLOC1S2                   | CCT4                    |
| CASC5                                                             |                                               | CNO                       | CTSD                    |
| CCDC62                                                            |                                               | EDN3                      | ERP29                   |
| CCDC83                                                            |                                               | EDNRB                     | FASN                    |
| CEP290                                                            |                                               | EN1                       | FLOT1                   |
| CEP55                                                             |                                               | FIG4                      | GANAB                   |
| COX6B2                                                            |                                               | FOXD1                     | GCHFR                   |
| CRISP2                                                            |                                               | FOXD3                     | GNA13                   |
| CSAG2 /// CSAG3                                                   |                                               | FOXD4                     | GNPMB                   |
| CT45A1 /// CT45A2 /// CT45A3 /// CT45A4 /// CT45A5 /// CT45A6 /// |                                               | FOXD4L1                   | GPR143                  |
| LOC101060208 /// LOC101060210 /// LOC101060211                    |                                               | FOXD4L6                   | HSP90B1                 |
| CTAG2                                                             |                                               | GNA11                     | HSPA5                   |
| CTAGE1                                                            |                                               | GPR143                    | ITGB1                   |
| CTAGE5 /// MIA2                                                   |                                               | HPS5                      | MLPH                    |
| CXorf48                                                           |                                               | HPS6                      | MMP14                   |
| CXorf61                                                           |                                               | IHH                       | MYH11                   |
| cyclin A1                                                         |                                               | KITLG                     | NAP1L1                  |
| DDX53                                                             |                                               | LYST                      | NCSTN                   |
| DKKL1                                                             |                                               | MAP2K1                    | OCA2                    |
| DMRT1                                                             |                                               | MITF                      | PDCD6IP                 |
| DPPA2                                                             |                                               | MKKS                      | PDIA3                   |
| DSCR8                                                             |                                               | MLPH                      | PDIA4                   |
| ELOVL4                                                            |                                               | MYO7A                     | PMEL                    |
| FAM133A                                                           |                                               | NF1                       | PPIB                    |
| FAM46D                                                            |                                               | OCA2                      | PRDX1                   |
| FATE1                                                             |                                               | POMC                      | RAB35                   |
| FTHL17                                                            |                                               | RECQL4                    | RAB5A                   |
| GAGE1 /// GAGE12B /// GAGE12C /// GAGE12D /// GAGE12E ///         |                                               | SHROOM2                   | RAB5B                   |
| GAGE12F /// GAGE12G /// GAGE12H /// GAGE12I /// GAGE12J ///       |                                               | SOD2                      | RAC1                    |
| GAGE2A /// GAGE2B /// GAGE2C /// GAGE2D /// GAGE2E ///            |                                               | SOX10                     | RAN                     |
| GAGE1 /// GAGE12C /// GAGE12D /// GAGE12E /// GAGE12F ///         |                                               | SZT2                      | RPN1                    |
| GAGE12G /// GAGE12H /// GAGE12I /// GAGE12J /// GAGE2A ///        |                                               | TH                        | SDCBP                   |
| GAGE2B /// GAGE2C /// GAGE2D /// GAGE2E /// GAGE3 /// GAGE4       |                                               | TYR                       | SEC22B                  |
| GAGE12F /// GAGE12G /// GAGE12I /// GAGE4 /// GAGE5 /// GAGE6     |                                               | TYRP1                     | SERPINF1                |
| /// GAGE7                                                         |                                               | VPS33A                    | SLC1A4                  |
| GAGE3                                                             |                                               | ZIC2                      | SLC1A5                  |
| GPAT2                                                             |                                               |                           | SLC24A5                 |
| GPATCH2                                                           |                                               |                           | SLC2A1                  |
| HEMGN                                                             |                                               |                           | SLC3A2                  |
| HORMAD1                                                           |                                               |                           | SLC45A2                 |
| HORMAD2                                                           |                                               |                           | SND1                    |
| HSPB9                                                             |                                               |                           | STOM                    |
| IGF2BP3                                                           |                                               |                           | SYNGR1                  |
| IGSF11                                                            |                                               |                           | SYPL1                   |
| IL13RA2                                                           |                                               |                           | SYTL2                   |
| KDM5B                                                             |                                               |                           | TH                      |
| KIAA0100                                                          |                                               |                           | TMED10                  |
| KIF20B                                                            |                                               |                           | TMEM33                  |

KIF2C  
 LDHC  
 LIPI  
 LOC100996400 /// NOL4  
 LOC101060193 /// XAGE2 /// XAGE2B  
 LOC101060230 /// MAGEA12  
 LOC101060424 /// LOC653786 /// OTOA  
 LOC253842 /// NR6A1  
 LOC440934  
 LUZP4  
 LYPD6B  
 LY6K  
 MAEL  
 MAGEA1  
 MAGEA10  
 MAGEA10-MAGEA5 /// MAGEA5  
 MAGEA11  
 MAGEA8  
 MAGEB1  
 MAGEB2  
 MAGEB4  
 MAGEB6  
 MORC1  
 MSANTD3-TMEFF1 /// TMEFF1  
 NXF2 /// NXF2B /// TCP11X1 /// TCP11X2  
 ODF2  
 ODF3  
 PAGE1  
 PAGE4  
 PAGE5  
 PASD1  
 PBK  
 PIWIL2  
 PLAC1  
 POTEG /// POTEM  
 PRAME  
 PRM2  
 PRSS50  
 PRSS54  
 PRSS55  
 RBM46  
 RGS22  
 RHOXF2  
 RNF17  
 RNF19  
 RNF20  
 RQCD1  
 SAGE1  
 SEMG1  
 SLCO6A1  
 SPA17  
 SPACA3  
 SPAG1  
 SPAG17  
 SPAG4  
 SPAG8  
 SPAG9  
 SPANXA1 /// SPANXA2  
 SPANXB1 /// SPANXB2 /// SPANXF1  
 SPANXC /// SPANXE  
 SPATA19  
 SPEF2  
 SPO11

TPP1  
 TRPV2  
 TYR  
 TYRP1  
 YWHAB  
 YWHAE  
 YWHAZ

Eye pigmentation<sup>c</sup>

AP3D1  
 GPR143  
 IHH  
 OCA2  
 TYR

SSX1  
SSX4 /// SSX4B  
SSX5  
TAF7L  
TDRD1  
TEKT5  
TEX14  
TFDP3  
THEG  
TMEFF2  
TMEM108  
TMPRSS12  
TPPP2  
TPTE  
TSGA10  
TTK  
TULP2  
VENTXP1  
XAGE1A /// XAGE1B /// XAGE1C /// XAGE1D /// XAGE1E  
XAGE3  
XAGE4  
ZNF165  
ZNF645

<sup>a</sup>Source: <http://www.cta.lncc.br>

<sup>b</sup>Source: <http://www.cancerimmunity.org/peptide/>

<sup>c</sup>Source: <http://amigo1.geneontology.org>

**Table S6.** Cox univariate analyses for the duration of DFS in uveal melanomas according to clinical, histological, genetic and immune infiltrate parameters

| Variable                      |                             | n  | Events | HR†     | 95% CI for HR† | p-value  |
|-------------------------------|-----------------------------|----|--------|---------|----------------|----------|
| Clinical features             | Age ≤ 60 years              | 31 | 12     | 1.0     | 0.6-2.4        | 0.6      |
|                               | > 60 years                  | 55 | 26     | 1.2     |                |          |
|                               | Gender female               | 41 | 15     | 1.0     | 0.9-3.1        | 0.1      |
|                               | male                        | 45 | 23     | 1.6     |                |          |
|                               | Diameter ≤ 15mm             | 16 | 7      | 1.0     | 0.4-2.4        | 1.0      |
|                               | > 15mm                      | 58 | 25     | 1.0     |                |          |
|                               | Thickness ≤ 8mm             | 15 | 8      | 1.0     | 0.4-1.9        | 0.7      |
| > 8mm                         | 66                          | 28 | 0.9    |         |                |          |
| Location choroid              | 36                          | 14 | 1.0    | 0.7-2.7 | 0.3            |          |
| choroid+CB‡                   | 50                          | 24 | 1.4    |         |                |          |
| Stage II                      | 25                          | 7  | 1.0    | 1.1-5.9 | 0.03*          |          |
| III & IV                      | 50                          | 26 | 2.5    |         |                |          |
| Extrascleral extension absent | 79                          | 32 | 1.0    | 1.5-8.6 | 0.005*         |          |
| present                       | 7                           | 6  | 3.5    |         |                |          |
| Histological features         | Epithelioid component ≤ 25% | 49 | 15     | 1.0     | 1.6-5.8        | 0.001*   |
|                               | > 25%                       | 36 | 23     | 3.0     |                |          |
|                               | Mitoses ≤ 10/40hpf          | 41 | 10     | 1.0     | 2.1-9.0        | < 0.001* |
|                               | > 10/40hpf                  | 44 | 28     | 4.4     |                |          |
| Necrosis absent               | 75                          | 29 | 1.0    | 1.6-7.3 | 0.001*         |          |
| present                       | 11                          | 9  | 3.4    |         |                |          |
| Pigmentation ≤ 25%            | 66                          | 28 | 1.0    | 0.6-2.6 | 0.5            |          |
| > 25%                         | 20                          | 10 | 1.3    |         |                |          |
| Copy number alterations       | M3 absent                   | 34 | 5      | 1.0     | 2.7-17.9       | < 0.001* |
|                               | present                     | 47 | 32     | 7.0     |                |          |
|                               | i8q absent                  | 65 | 23     | 1.0     | 2.7-10.8       | < 0.001* |
|                               | present                     | 16 | 14     | 5.4     |                |          |
|                               | 8q+ absent                  | 41 | 9      | 1.0     | 2.4-11.1       | < 0.001* |
|                               | present                     | 40 | 28     | 5.2     |                |          |
|                               | 8p- absent                  | 59 | 22     | 1.0     | 1.3-5.0        | 0.005*   |
|                               | present                     | 22 | 15     | 2.6     |                |          |
| 6p+ absent                    | 55                          | 28 | 1.0    | 0.3-1.2 | 0.1            |          |
| present                       | 26                          | 9  | 0.5    |         |                |          |
| 1p- absent                    | 63                          | 27 | 1.0    | 0.6-2.5 | 0.6            |          |
| present                       | 18                          | 10 | 1.2    |         |                |          |
| LZTS1 deletion absent         | 43                          | 16 | 1.0    | 1.0-3.5 | 0.07           |          |
| present                       | 38                          | 21 | 1.8    |         |                |          |
| NBL1 deletion absent          | 44                          | 18 | 1.0    | 0.6-2.2 | 0.6            |          |
| present                       | 37                          | 19 | 1.2    |         |                |          |
| Immune infiltrate             | Immune infiltrate-low       | 67 | 22     | 1.0     | 2.4-9.0        | < 0.001* |
|                               | Immune infiltrate-high      | 19 | 16     | 4.6     |                |          |

\* p ≤ 0.05 considered significant

‡CB: ciliary body †HR: hazard ratio

**Table S7. Cox univariate and multivariate analyses for the duration of DFS on MLPA probes**

| Chromosome/<br>alteration         | Gene                  | HR   | 95.0% CI<br>for HR | p-value  |
|-----------------------------------|-----------------------|------|--------------------|----------|
| <i>Univariate</i>                 |                       |      |                    |          |
| 1p-                               | <i>MFN2</i>           | 1.0  | 0.5-1.9            | 0.9      |
|                                   | <i>NBL1</i>           | 1.2  | 0.6-2.2            | 0.6      |
|                                   | <i>PTAFR</i>          | 1.0  | 0.5-2.0            | 1.0      |
|                                   | <i>GJB3</i>           | 0.7  | 0.4-1.4            | 0.3      |
|                                   | <i>MUTYH</i>          | 0.8  | 0.4-1.6            | 0.5      |
|                                   | <i>RPE65</i>          | 1.1  | 0.6-2.2            | 0.8      |
|                                   | <i>NOTCH2</i>         | 1.0  | 0.5-2.0            | 0.9      |
| 3p-                               | <i>CHL1</i>           | 2.2  | 1.1-4.6            | 0.03*    |
|                                   | <i>VHL</i>            | 2.7  | 0.8-8.8            | 0.1      |
|                                   | <i>C3ORF10</i>        | 5.6  | 2.0-15.8           | 0.001*   |
|                                   | <i>PPARG</i>          | 2.7  | 1.4-5.3            | 0.004*   |
|                                   | <i>XPC</i>            | 3.1  | 1.0-10.2           | 0.06     |
|                                   | <i>MIR128</i>         | 4.7  | 2.0-11.4           | 0.001*   |
|                                   | <i>MLH1</i>           | 3.7  | 1.5-9.0            | 0.003*   |
|                                   | <i>CTNNB1</i>         | 2.1  | 1.0-4.3            | 0.04*    |
|                                   | <i>RBM5</i>           | 2.7  | 1.3-5.7            | 0.01*    |
|                                   | <i>BAP1</i>           | 3.3  | 1.2-9.3            | 0.03*    |
|                                   | <i>FHIT</i>           | 7.1  | 2.2-23.3           | 0.001*   |
|                                   | <i>ROBO1</i>          | 2.3  | 0.8-6.5            | 0.1      |
| 3q-                               | <i>PROS1</i>          | 2.6  | 1.2-5.8            | 0.02*    |
|                                   | <i>CASR</i>           | 2.6  | 1.2-5.6            | 0.01*    |
|                                   | <i>MME</i>            | 6.1  | 2.1-17.2           | 0.001*   |
|                                   | <i>OPA1</i>           | 2.6  | 1.2-5.6            | 0.01*    |
| 6p+                               | <i>ECI2</i>           | 0.7  | 0.3-1.3            | 0.2      |
|                                   | <i>DCDC2</i>          | 0.7  | 0.4-1.3            | 0.3      |
|                                   | <i>CDKN1A</i>         | 0.5  | 0.3-1.0            | 0.06     |
|                                   | <i>RUNX2</i>          | 0.6  | 0.3-1.2            | 0.2      |
| 6q-                               | <i>CTGF</i>           | 0.8  | 0.4-1.7            | 0.6      |
|                                   | <i>IGF2R</i>          | 0.8  | 0.4-1.5            | 0.4      |
| 8p-                               | <i>LZTS1</i>          | 1.8  | 1.0-3.5            | 0.07     |
|                                   | <i>NRG1</i>           | 2.8  | 1.5-5.5            | 0.002*   |
| 8q+                               | <i>RPI</i>            | 5.3  | 2.5-11.0           | < 0.001* |
|                                   | <i>MYC</i>            | 6.6  | 0.9-48.1           | 0.06     |
|                                   | <i>ASAP1</i>          | 6.1  | 1.9-19.9           | 0.003*   |
| <i>Multivariate - final model</i> |                       |      |                    |          |
|                                   | <i>NBL1</i> deletion  | 5.3  | 2.2-13.0           | < 0.001* |
|                                   | <i>LZTS1</i> deletion | 5.3  | 2.2-12.8           | < 0.001* |
|                                   | M3                    | 11.0 | 3.4-35.7           | < 0.001* |
|                                   | 8q+                   | 3.9  | 1.6-9.2            | 0.002*   |

\*  $p \leq 0.05$  considered significant

**Table S8.** Cox multivariate analyses for the duration of DFS in uveal melanomas for the various models constructed

| <i>Before backward stepwise</i>                |            |                        |                | <i>Final model</i>                           |            |                        |                |
|------------------------------------------------|------------|------------------------|----------------|----------------------------------------------|------------|------------------------|----------------|
| <b>Variables in the model at the beginning</b> | <b>HR†</b> | <b>95.0% CI for HR</b> | <b>p-value</b> | <b>Variables retained in the final model</b> | <b>HR†</b> | <b>95.0% CI for HR</b> | <b>p-value</b> |
| <b>Classic</b>                                 |            |                        |                | <b>Classic</b>                               |            |                        |                |
| Immune infiltrate                              | 0.9        | 0.3-2.8                | 0.89           | Mitoses                                      | 3.5        | 1.4-8.3                | 0.005*         |
| Gender                                         | 0.7        | 0.3-1.7                | 0.40           | Extrascleral extension                       | 8          | 2.5-25.2               | <0.001*        |
| Stage                                          | 0.9        | 0.3-2.6                | 0.92           | M3                                           | 3.1        | 1.1-9.1                | 0.04*          |
| Epithelioid component                          | 1.6        | 0.6-4.1                | 0.32           | Isochromosome 8q                             | 4.2        | 1.7-10.3               | 0.002*         |
| Mitoses                                        | 2.5        | 0.9-7.1                | 0.09           |                                              |            |                        |                |
| Necrosis                                       | 2.7        | 0.8-8.7                | 0.10           |                                              |            |                        |                |
| Extrascleral extension                         | 6.6        | 1.2-36.9               | 0.03           |                                              |            |                        |                |
| M3                                             | 5.1        | 1.0-25.4               | 0.05           |                                              |            |                        |                |
| 8q+                                            | 1.2        | 0.4-4.0                | 0.73           |                                              |            |                        |                |
| Isochromosome 8q                               | 3.1        | 0.1-77.0               | 0.50           |                                              |            |                        |                |
| 8p-                                            | 1.1        | 0.1-13.1               | 0.95           |                                              |            |                        |                |
| LZTS1 deletion                                 | 1.4        | 0.3-6.4                | 0.63           |                                              |            |                        |                |
| 6p+                                            | 1.4        | 0.5-4.3                | 0.53           |                                              |            |                        |                |
| <b>Clinical</b>                                |            |                        |                | <b>Clinical</b>                              |            |                        |                |
| Age                                            | 1.0        | 0.5-2.1                | 0.9            | Stage                                        | 2.5        | 1.1-5.8                | 0.03*          |
| Gender                                         | 1.6        | 0.8-3.3                | 0.2            | Extrascleral extension                       | 3.2        | 1.2-8.3                | 0.02*          |
| Stage                                          | 3.9        | 1.2-12.3               | 0.02*          |                                              |            |                        |                |
| Location                                       | 0.6        | 0.2-1.6                | 0.3            |                                              |            |                        |                |
| Extrascleral extension                         | 2.0        | 0.6-6.5                | 0.3            |                                              |            |                        |                |
| <b>Histology</b>                               |            |                        |                | <b>Histology</b>                             |            |                        |                |
| Epithelioid component                          | 2.0        | 1.0-4.0                | 0.05*          | Epithelioid component                        | 2.1        | 1.0-4.1                | 0.04*          |
| Mitotic activity                               | 3.0        | 1.4-6.6                | 0.006*         | Mitotic activity                             | 2.9        | 1.3-6.5                | 0.008*         |
| Pigmentation                                   | 1.3        | 0.6-2.7                | 0.5            | Necrosis                                     | 2.1        | 1.0-4.6                | 0.06           |
| Necrosis                                       | 2.1        | 0.9-4.5                | 0.07           |                                              |            |                        |                |
| <b>CNA</b>                                     |            |                        |                | <b>CNA</b>                                   |            |                        |                |
| 8p-                                            | 1.5        | 0.5-4.6                | 0.5            | M3                                           | 11.0       | 3.4-35.7               | < 0.001*       |
| M3                                             | 14.5       | 3.7-55.9               | < 0.001*       | 8q+                                          | 3.9        | 1.6-9.2                | 0.002*         |
| 8q+                                            | 4.4        | 1.7-11.2               | 0.002*         | LZTS1 deletion                               | 5.3        | 2.2-12.8               | < 0.001*       |
| 6p+                                            | 1.5        | 0.5-4.3                | 0.5            | NBL1 deletion                                | 5.3        | 2.2-13.0               | < 0.001*       |
| LZTS1 deletion                                 | 4.3        | 1.4-13.6               | 0.01*          |                                              |            |                        |                |
| 1p-                                            | 1.5        | 0.6-4.0                | 0.4            |                                              |            |                        |                |
| NBL1 deletion                                  | 5.1        | 1.8-14.5               | 0.002*         |                                              |            |                        |                |
| <b>Immune-CNA</b>                              |            |                        |                | <b>Immune-CNA</b>                            |            |                        |                |
| 8p-                                            | 1.5        | 0.5-4.6                | 0.5            | M3                                           | 9.2        | 2.7-31.1               | < 0.001*       |
| M3                                             | 14.5       | 3.7-55.9               | < 0.001*       | 8q+                                          | 3.6        | 1.5-8.7                | 0.005*         |
| 8q+                                            | 4.4        | 1.7-11.2               | 0.002*         | LZTS1 deletion                               | 4.6        | 1.8-11.6               | 0.001*         |
| 6p+                                            | 1.5        | 0.5-4.3                | 0.5            | NBL1 deletion                                | 5.8        | 2.3-14.8               | < 0.001*       |
| LZTS1 deletion                                 | 4.3        | 1.4-13.6               | 0.01*          | Immune infiltrate ‡                          | 1.6        | 0.7-3.7                | 0.2            |
| 1p-                                            | 1.5        | 0.6-4.0                | 0.4            |                                              |            |                        |                |
| NBL1 deletion                                  | 5.1        | 1.8-14.5               | 0.002*         |                                              |            |                        |                |
| Immune infiltrate                              |            |                        |                |                                              |            |                        |                |

\* p ≤ 0.05 considered significant, ‡ Immune forced into the model

†HR: hazard ratio

**Table S9. Predictive accuracies of Cox univariate and multivariate models**

| Variable                   | Cox PHA† | AUC at fixed time points (months) |      |       |       |       | Integrated AUC (C <sup>T</sup> ) (months) |      |      |      |      | Harrell's C-index | SE§  |
|----------------------------|----------|-----------------------------------|------|-------|-------|-------|-------------------------------------------|------|------|------|------|-------------------|------|
|                            |          | 12                                | 24   | 36    | 48    | 64    | 12                                        | 24   | 36   | 48   | 64   |                   |      |
| <b>Univariate</b>          |          |                                   |      |       |       |       |                                           |      |      |      |      |                   |      |
| Immune infiltrate          | 0.77     | 0.66                              | 0.65 | 0.628 | 0.551 | 0.502 | 0.68                                      | 0.67 | 0.66 | 0.66 | 0.65 | 0.653             | 0.03 |
| Age‡                       | 0.03     | 0.54                              | 0.54 | 0.583 | 0.607 | 0.7   | 0.56                                      | 0.55 | 0.55 | 0.56 | 0.57 | 0.502             | 0.04 |
| Gender                     | 0.34     | 0.56                              | 0.56 | 0.572 | 0.561 | 0.539 | 0.56                                      | 0.56 | 0.56 | 0.56 | 0.56 | 0.578             | 0.04 |
| Diameter                   | 0.89     | 0.5                               | 0.49 | 0.513 | 0.502 | 0.516 | 0.5                                       | 0.5  | 0.5  | 0.5  | 0.5  | 0.503             | 0.04 |
| Thickness                  | 0.22     | 0.5                               | 0.5  | 0.518 | 0.511 | 0.515 | 0.5                                       | 0.5  | 0.51 | 0.51 | 0.51 | 0.501             | 0.04 |
| Location                   | 0.71     | 0.54                              | 0.54 | 0.553 | 0.542 | 0.544 | 0.54                                      | 0.54 | 0.54 | 0.54 | 0.54 | 0.546             | 0.04 |
| Stage                      | 0.18     | 0.59                              | 0.59 | 0.62  | 0.609 | 0.609 | 0.59                                      | 0.59 | 0.59 | 0.59 | 0.59 | 0.610             | 0.04 |
| Extrasclearal extension    | 0.80     | 0.56                              | 0.54 | 0.533 | 0.5   | 0.502 | 0.57                                      | 0.57 | 0.56 | 0.56 | 0.55 | 0.559             | 0.02 |
| Epithelioid                | 0.32     | 0.64                              | 0.64 | 0.628 | 0.631 | 0.619 | 0.64                                      | 0.64 | 0.64 | 0.64 | 0.64 | 0.651             | 0.04 |
| Mitotic activity‡          | 0.03     | 0.72                              | 0.63 | 0.56  | 0.572 | 0.584 | 0.73                                      | 0.72 | 0.69 | 0.68 | 0.67 | 0.690             | 0.04 |
| Necrosis                   | 0.97     | 0.59                              | 0.57 | 0.569 | 0.535 | 0.551 | 0.59                                      | 0.58 | 0.58 | 0.58 | 0.58 | 0.579             | 0.03 |
| Pigmentation               | 0.33     | 0.53                              | 0.51 | 0.53  | 0.515 | 0.511 | 0.52                                      | 0.52 | 0.52 | 0.52 | 0.52 | 0.519             | 0.04 |
| M3                         | 0.83     | 0.68                              | 0.69 | 0.725 | 0.715 | 0.721 | 0.67                                      | 0.68 | 0.69 | 0.69 | 0.69 | 0.692             | 0.04 |
| i8q                        | 0.78     | 0.65                              | 0.64 | 0.585 | 0.561 | 0.502 | 0.68                                      | 0.67 | 0.66 | 0.65 | 0.64 | 0.654             | 0.03 |
| 8q+                        | 0.42     | 0.68                              | 0.69 | 0.711 | 0.695 | 0.707 | 0.68                                      | 0.69 | 0.69 | 0.69 | 0.69 | 0.699             | 0.04 |
| 8p-                        | 0.29     | 0.59                              | 0.6  | 0.587 | 0.586 | 0.583 | 0.61                                      | 0.61 | 0.6  | 0.6  | 0.6  | 0.617             | 0.04 |
| 6p+                        | 0.34     | 0.56                              | 0.56 | 0.577 | 0.568 | 0.549 | 0.56                                      | 0.56 | 0.56 | 0.56 | 0.56 | 0.576             | 0.04 |
| 1p-                        | 0.10     | 0.52                              | 0.51 | 0.529 | 0.518 | 0.555 | 0.51                                      | 0.51 | 0.51 | 0.51 | 0.51 | 0.499             | 0.04 |
| <i>LZTS1</i> deletion      | 0.16     | 0.57                              | 0.57 | 0.576 | 0.577 | 0.585 | 0.58                                      | 0.58 | 0.58 | 0.58 | 0.58 | 0.594             | 0.04 |
| <i>NBL1</i> deletion       | 0.09     | 0.52                              | 0.51 | 0.53  | 0.52  | 0.542 | 0.51                                      | 0.52 | 0.52 | 0.52 | 0.52 | 0.502             | 0.04 |
| <b>Multivariate models</b> |          |                                   |      |       |       |       |                                           |      |      |      |      |                   |      |
| Clinical                   | 0.43     | 0.63                              | 0.62 | 0.618 | 0.608 | 0.608 | 0.64                                      | 0.64 | 0.63 | 0.63 | 0.63 | 0.631             | 0.05 |
| Histology                  | 0.20     | 0.73                              | 0.73 | 0.722 | 0.699 | 0.715 | 0.73                                      | 0.73 | 0.73 | 0.73 | 0.72 | 0.743             | 0.05 |
| CNA                        | 0.22     | 0.8                               | 0.82 | 0.832 | 0.788 | 0.801 | 0.82                                      | 0.82 | 0.83 | 0.82 | 0.82 | 0.797             | 0.05 |
| Immune-CNA                 | 0.33     | 0.82                              | 0.83 | 0.837 | 0.794 | 0.797 | 0.83                                      | 0.83 | 0.83 | 0.83 | 0.83 | 0.809             | 0.05 |
| Classic                    | 0.50     | 0.82                              | 0.83 | 0.801 | 0.798 | 0.758 | 0.84                                      | 0.83 | 0.83 | 0.83 | 0.82 | 0.844             | 0.05 |
| <b>Cassoux model¶</b>      |          |                                   |      |       |       |       |                                           |      |      |      |      |                   |      |
| M3/8q+                     | 0.65     | 0.74                              | 0.75 | 0.778 | 0.759 | 0.743 | 0.73                                      | 0.74 | 0.75 | 0.75 | 0.75 | 0.748             | 0.05 |

‡Local Cox

†PHA: proportional hazards assumption; §SE: standard error

¶From Cassoux, et al. Br J Ophthalmol. 2013 Oct 29
